# Supplementary material for: α-Fe2O3 nanowires deposited diatomite: highly efficient absorbents for the removal of arsenic
Source: Royal Society of Chemistry journal article supplement (doi:10.1039/c3ta11124e), 2013-01-01
Supplement: c3ta11124e.pdf [file c3ta11124e.pdf]

## Supplementary Data:

### **$\alpha$ -Fe<sub>2</sub>O<sub>3</sub> nanowires deposited diatomite: highly efficient absorbents for the removal of arsenic**

Yucheng Du <sup>a,\*</sup>, Haiguang Fan <sup>a</sup>, Liping Wang <sup>a</sup>, Jinshu Wang <sup>a,\*\*</sup>, Junshu Wu <sup>a</sup>,  
Hongxing Dai <sup>b,\*\*\*</sup>

<sup>a</sup> *Key Lab of Advanced Functional Materials, Ministry of Education, College of Materials Science and Engineering, Beijing University of Technology, Beijing 100124, PR China*

<sup>b</sup> *Laboratory of Catalysis Chemistry and Nanoscience, Department of Chemistry and Chemical Engineering, College of Environmental and Energy Engineering, Beijing University of Technology, Beijing 100124, PR China*

\* Corresponding author: Dr. Yucheng Du (Y.C. Du)

Tel. No.: +8610-6739-6129; Fax: +8610-6739-6129

E-mail address: [ychengdu@bjut.edu.cn](mailto:ychengdu@bjut.edu.cn)

\*\* Co-corresponding author: Prof. Jinshu Wang (J.S. Wang)

Tel. No.: +8610-6739-6129; Fax: +8610-6739-6129

E-mail address: [wangjs@bjut.edu.cn](mailto:wangjs@bjut.edu.cn)

\*\*\* Co-corresponding author: Prof. Hongxing Dai (H. X. Dai)

Tel. No.: +8610-6739-6118; Fax: +8610-6739-1983

E-mail address: [hxdai@bjut.edu.cn](mailto:hxdai@bjut.edu.cn)

## Content

| Item            | Page |
|-----------------|------|
| <b>Table S1</b> | 3    |
| <b>Fig. S1</b>  | 4    |
| <b>Fig. S2</b>  | 5    |
| <b>Fig. S3</b>  | 6    |
| <b>Fig. S4</b>  | 7    |
| <b>Fig. S5</b>  | 8    |
| <b>Fig. S6</b>  | 9    |
| <b>Fig. S7</b>  | 10   |

**Table S1.** The As(III) and As(V) removal efficiency of the  $\alpha$ -Fe<sub>2</sub>O<sub>3</sub> nanowires/diatomite sample prepared with different FeCl<sub>3</sub> concentrations.

| FeCl <sub>3</sub> concentration<br>(wt%) | Removal efficiency (%) |        |
|------------------------------------------|------------------------|--------|
|                                          | As(III)                | As(V)  |
| 0                                        | 46.51                  | 52.73  |
| 6                                        | 83.17                  | 90.25  |
| 8                                        | 99.98                  | 100.00 |
| 10                                       | 96.77                  | 98.36  |

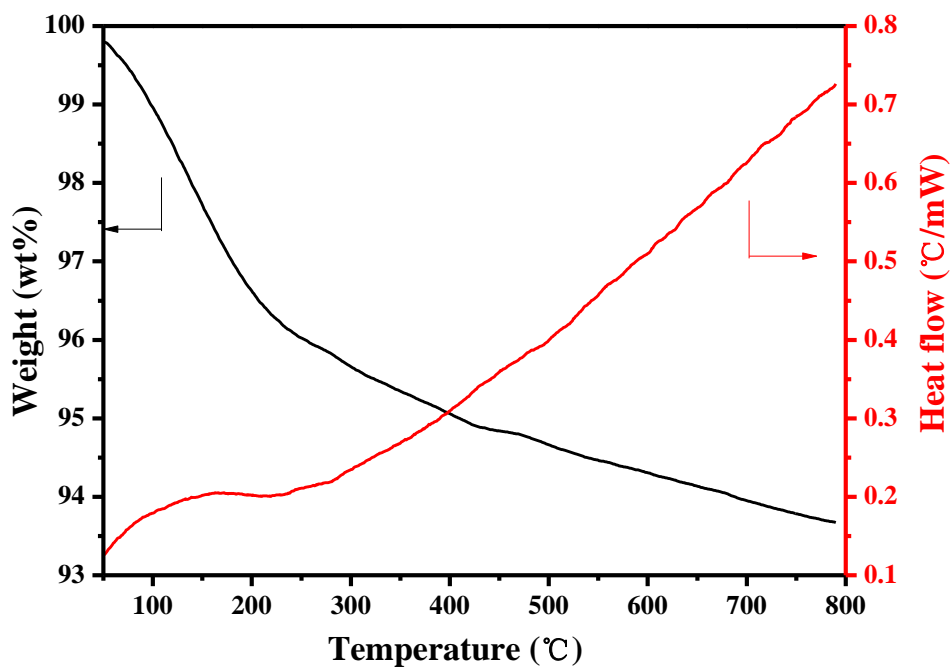

**Fig. S1.** TGA/DTA profiles of the  $\alpha$ -FeOOH/diatomite sample.

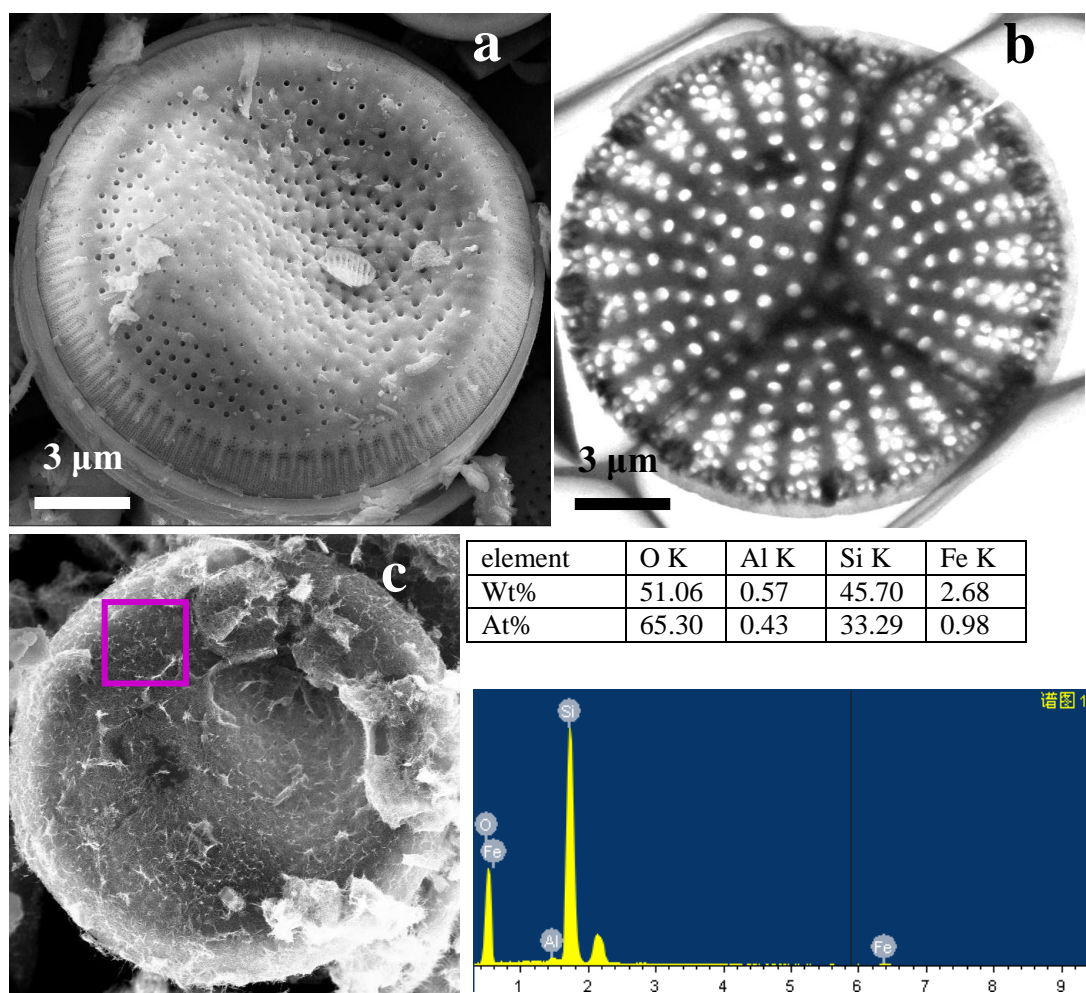

**Fig. S2.** (a) SEM and (b) TEM images of the diatomite and (c) EDS spectrum of the  $\alpha$ -Fe<sub>2</sub>O<sub>3</sub> nanowires/diatomite sample

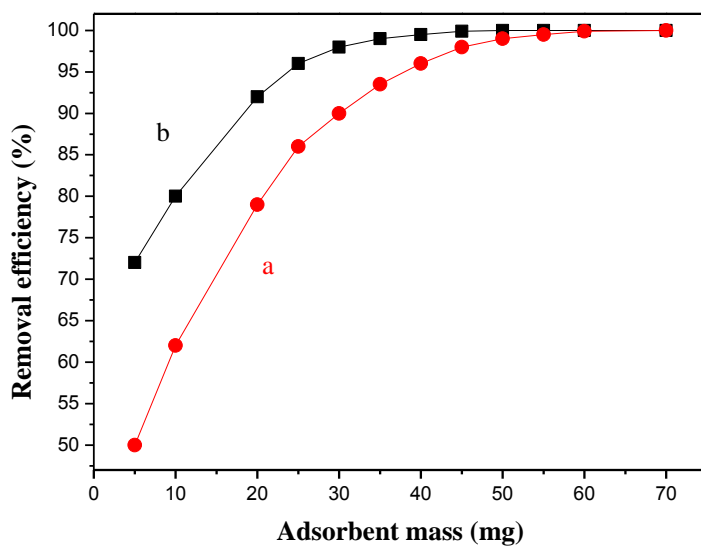

**Fig. S3.** Effect of adsorbent mass on the (a) As(III) and (b) As(V) removal efficiency of the  $\alpha$ -Fe<sub>2</sub>O<sub>3</sub> nanowires/diatomite sample at an As(III) or As(V) concentration of 10 mg/L.

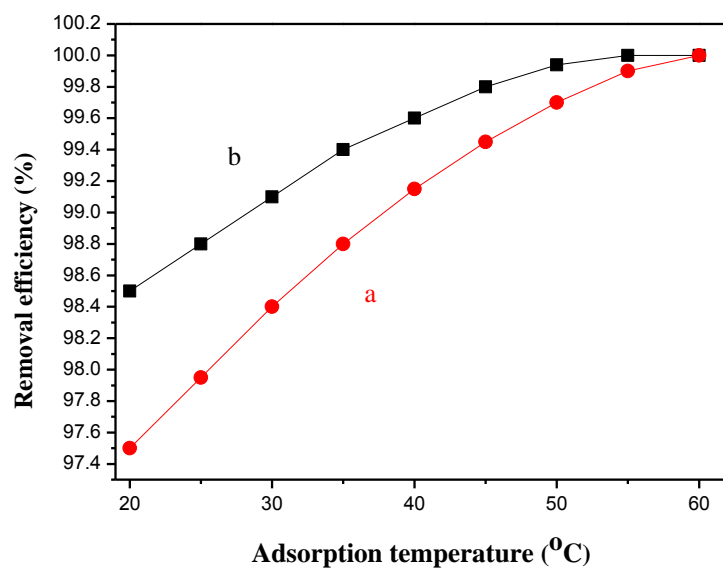

**Fig. S4.** Effect of adsorption temperature on the (a) As(III) and (b) As(V) removal efficiency of the  $\alpha$ -Fe<sub>2</sub>O<sub>3</sub> nanowires/diatomite sample at an As(III) or As(V) concentration of 10 mg/L.

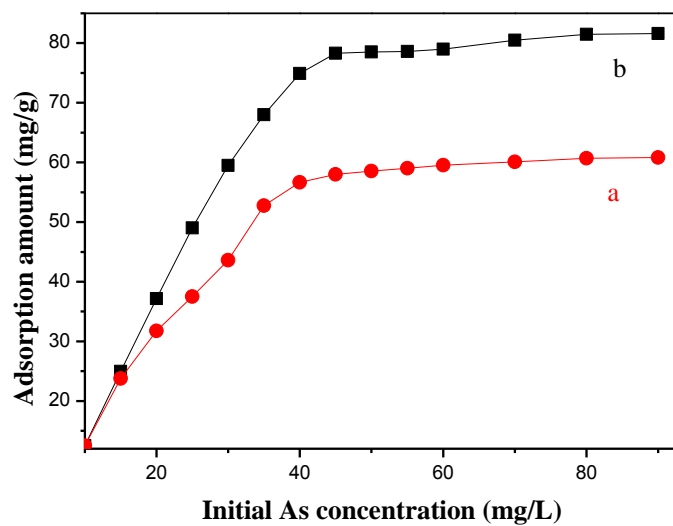

**Fig. S5.** Isothermal (a) As(III) and (b) As(V) adsorption profiles of the  $\alpha$ -Fe<sub>2</sub>O<sub>3</sub> nanowires/diatomite sample.



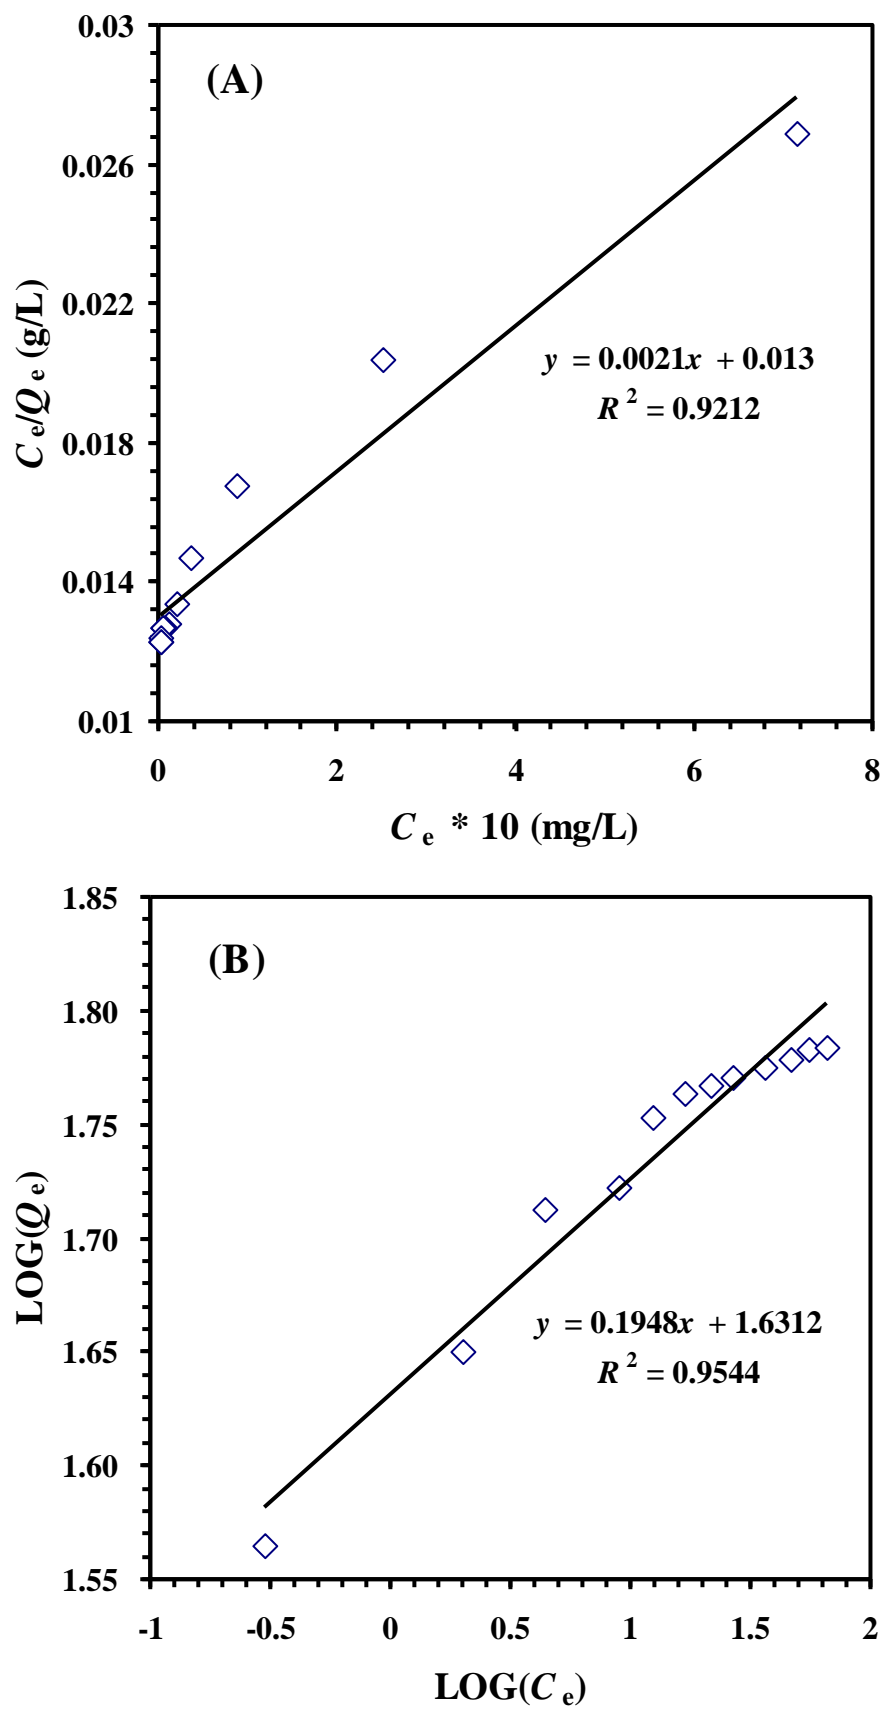

**Fig. S6.** The Langmuir and Freundlich regression curves of As(III) adsorption on the  $\alpha$ -Fe<sub>2</sub>O<sub>3</sub> nanowires/diatomite sample.

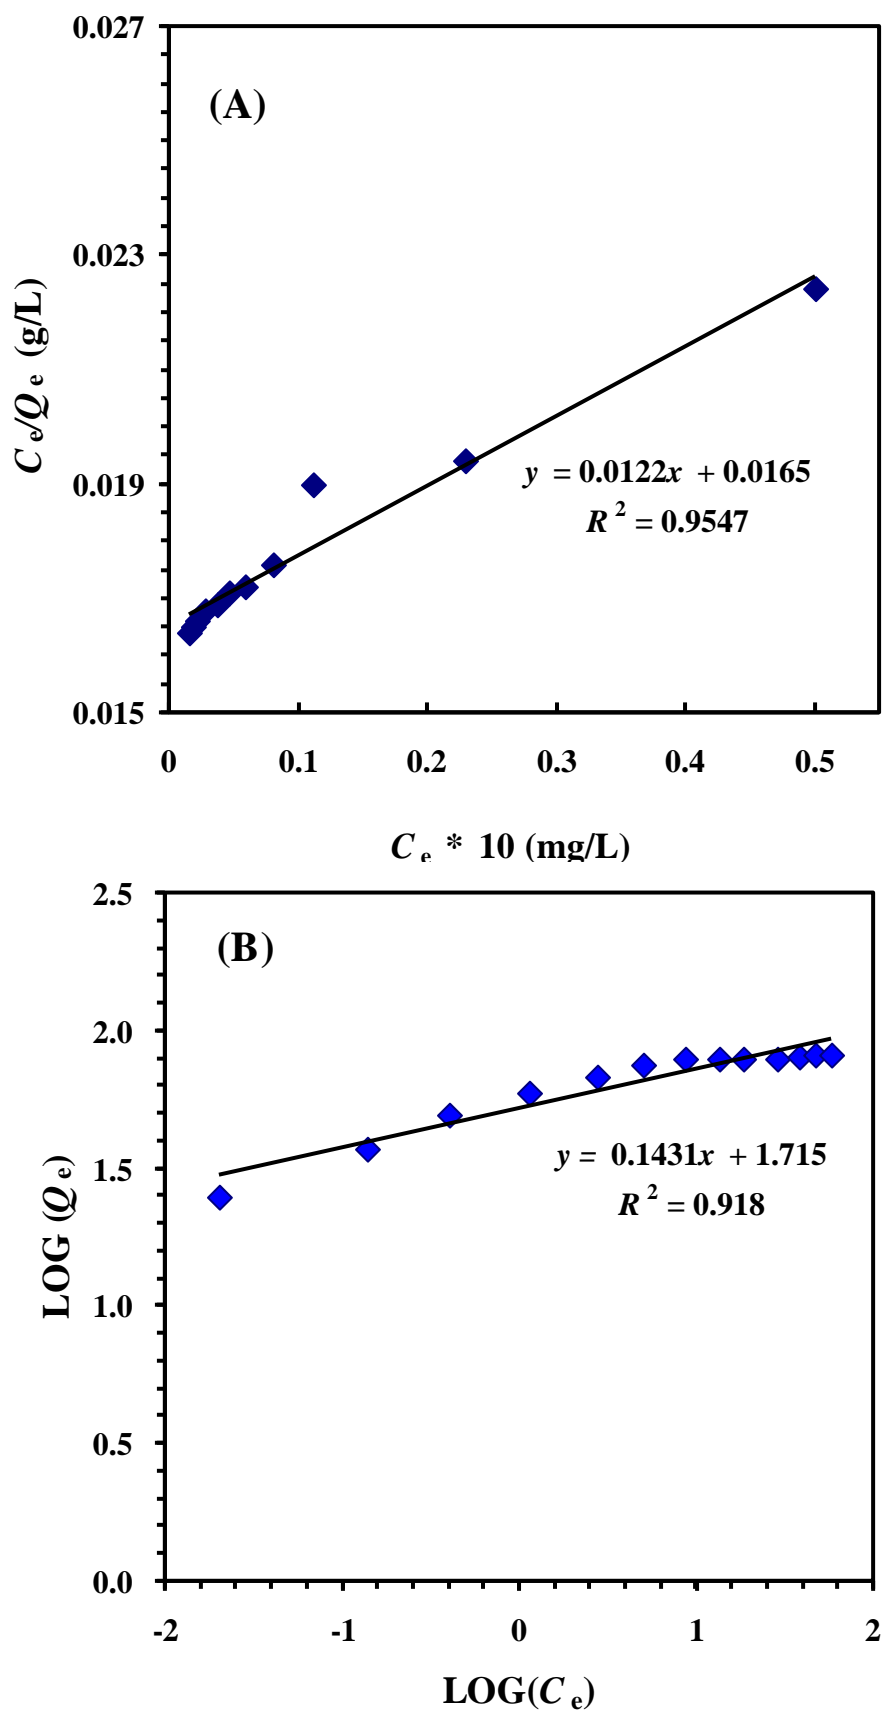

**Fig. S7.** The (A) Langmuir and (B) Freundlich regression curves of As(V) adsorption on the  $\alpha$ -Fe<sub>2</sub>O<sub>3</sub> nanowires/diatomite sample.
